# Supplementary material for: Circadian Syndrome Is Associated with Dietary Patterns among Middle-Older Americans: The Health and Retirement Study
Source: MDPI journal article supplement (doi:10.3390/nu16060760), 2024-03-07
Supplement: s1 [file s1]

**Supplemental Figure S1** Factor loadings of dietary patterns among participants attending Health and Retirement Study

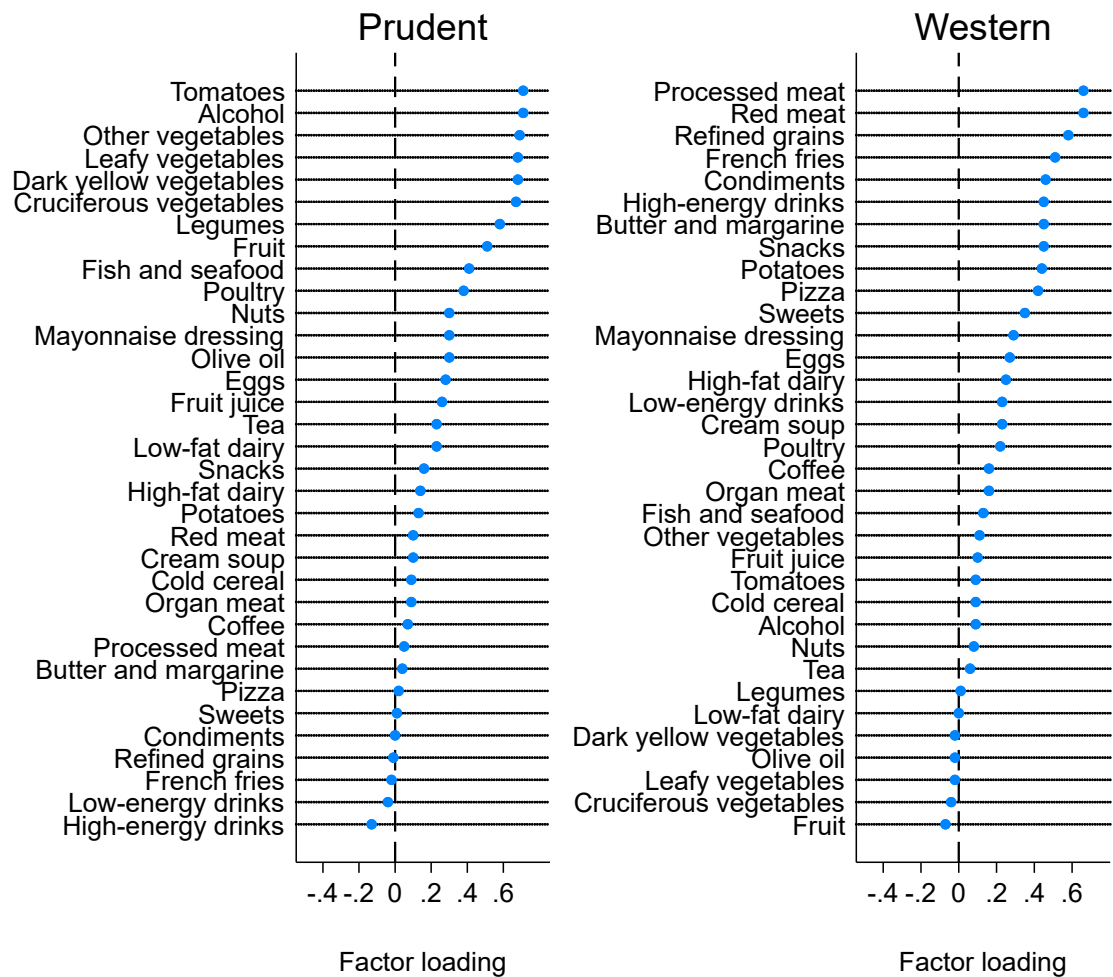

Variance explained (%): Prudent Pattern (14.0%), Western Pattern (8.6%).

**Supplemental Table S1:** Sample characteristics by quartiles of Prudent Pattern among adults attending Health and Retirement Study

|                                   | Total          | Q1             | Q2             | Q3             | Q4             | p-value |
|-----------------------------------|----------------|----------------|----------------|----------------|----------------|---------|
|                                   | N=4,253        | N=1,064        | N=1,063        | N=1,063        | N=1,063        |         |
| Energy intake (kcal/day)          | 1830.0 (793.5) | 1370.3 (640.2) | 1605.6 (568.3) | 1892.2 (633.6) | 2452.2 (855.9) | <0.001  |
| Protein intake (g/day)            | 71.9 (33.2)    | 50.6 (23.2)    | 62.4 (22.1)    | 75.4 (27.2)    | 99.1 (36.9)    | <0.001  |
| Fat intake (g/day)                | 67.5 (32.1)    | 50.0 (25.8)    | 59.2 (24.2)    | 70.6 (26.5)    | 90.4 (35.6)    | <0.001  |
| Carbohydrate intake (g/day)       | 229.7 (109.0)  | 173.1 (88.0)   | 200.4 (78.5)   | 234.4 (89.6)   | 310.9 (122.0)  | <0.001  |
| Western pattern                   | 0.00 (1.00)    | -1.00 (0.20)   | -0.48 (0.15)   | 0.11 (0.20)    | 1.37 (0.88)    | <0.001  |
| Prudent pattern                   | -0.00 (1.00)   | 0.01 (0.99)    | -0.05 (0.88)   | 0.02 (0.96)    | 0.02 (1.16)    | 0.24    |
| Age (years)                       | 65.4 (10.0)    | 64.8 (9.5)     | 66.2 (10.1)    | 66.0 (10.1)    | 64.7 (10.2)    | <0.001  |
| Gender                            |                |                |                |                |                | <0.001  |
| Men                               | 1,736 (40.8%)  | 488 (45.9%)    | 459 (43.2%)    | 404 (38.0%)    | 385 (36.2%)    |         |
| Women                             | 2,517 (59.2%)  | 576 (54.1%)    | 604 (56.8%)    | 659 (62.0%)    | 678 (63.8%)    |         |
| Race                              |                |                |                |                |                | <0.001  |
| White                             | 3,286 (77.5%)  | 773 (72.8%)    | 834 (78.6%)    | 872 (82.2%)    | 807 (76.3%)    |         |
| Black African American            | 632 (14.9%)    | 214 (20.2%)    | 149 (14.0%)    | 133 (12.5%)    | 136 (12.9%)    |         |
| Other                             | 323 ( 7.6%)    | 75 ( 7.1%)     | 78 ( 7.4%)     | 56 ( 5.3%)     | 114 (10.8%)    |         |
| Education                         |                |                |                |                |                | <0.001  |
| High school grad or below         | 2,073 (48.8%)  | 644 (60.6%)    | 508 (47.9%)    | 449 (42.2%)    | 472 (44.4%)    |         |
| Some college/college grad         | 1,085 (25.5%)  | 260 (24.5%)    | 271 (25.5%)    | 287 (27.0%)    | 267 (25.1%)    |         |
| Post-college                      | 1,092 (25.7%)  | 159 (15.0%)    | 282 (26.6%)    | 327 (30.8%)    | 324 (30.5%)    |         |
| Smoking                           |                |                |                |                |                | <0.001  |
| None                              | 1,934 (45.7%)  | 454 (43.0%)    | 468 (44.2%)    | 506 (47.8%)    | 506 (47.7%)    |         |
| Ex-smoker                         | 1,889 (44.6%)  | 436 (41.3%)    | 495 (46.8%)    | 482 (45.5%)    | 476 (44.9%)    |         |
| Current smoker                    | 410 ( 9.7%)    | 166 (15.7%)    | 95 ( 9.0%)     | 71 ( 6.7%)     | 78 ( 7.4%)     |         |
| Alcohol drinking                  |                |                |                |                |                | <0.001  |
| No                                | 1,838 (43.3%)  | 527 (49.6%)    | 469 (44.2%)    | 387 (36.4%)    | 455 (42.8%)    |         |
| Yes                               | 2,411 (56.7%)  | 536 (50.4%)    | 592 (55.8%)    | 676 (63.6%)    | 607 (57.2%)    |         |
| <b>Vigorous physical activity</b> |                |                |                |                |                | <0.001  |
| < 2 times/week                    | 3,183 (75.2%)  | 887 (83.8%)    | 804 (76.1%)    | 791 (74.6%)    | 701 (66.4%)    |         |
| ≥ 2 times/week                    | 1,047 (24.8%)  | 172 (16.2%)    | 252 (23.9%)    | 269 (25.4%)    | 354 (33.6%)    |         |
| Central obesity                   | 2,849 (71.6%)  | 747 (75.4%)    | 708 (71.2%)    | 716 (71.7%)    | 678 (68.3%)    | 0.006   |
| Elevated glucose                  | 2,129 (50.3%)  | 542 (51.2%)    | 514 (48.6%)    | 552 (52.1%)    | 521 (49.3%)    | 0.33    |
| Elevated triglycerides            | 1,504 (35.4%)  | 418 (39.3%)    | 341 (32.1%)    | 375 (35.3%)    | 370 (34.8%)    | 0.006   |
| Reduced HDL-C                     | 1,059 (24.9%)  | 307 (28.9%)    | 256 (24.1%)    | 243 (22.9%)    | 253 (23.8%)    | 0.006   |
| Elevated blood pressure           | 2,966 (69.8%)  | 781 (73.4%)    | 753 (70.9%)    | 723 (68.0%)    | 709 (66.7%)    | 0.003   |
| Depression                        | 543 (12.8%)    | 176 (16.5%)    | 127 (12.0%)    | 100 ( 9.4%)    | 140 (13.2%)    | <0.001  |
| Sleep disorder                    | 1,345 (31.6%)  | 382 (35.9%)    | 352 (33.1%)    | 293 (27.6%)    | 318 (29.9%)    | <0.001  |
| Metabolic syndrome                | 2,055 (48.3%)  | 558 (52.4%)    | 483 (45.4%)    | 531 (50.0%)    | 483 (45.4%)    | 0.001   |
| Circadian syndrome                | 1,527 (35.9%)  | 429 (40.3%)    | 363 (34.1%)    | 365 (34.3%)    | 370 (34.8%)    | 0.007   |

Data are presented as mean (SD) for continuous measures, and n (%) for categorical measures.

\*P-value < 0.05

**Supplemental Table S2:** Sample characteristics by quartiles of Western Pattern among adults attending Health and Retirement Study

|                                   | Total          | Q1             | Q2             | Q3             | Q4             | p-value |
|-----------------------------------|----------------|----------------|----------------|----------------|----------------|---------|
|                                   | N=4,253        | N=1,064        | N=1,063        | N=1,063        | N=1,063        |         |
| Energy intake (kcal/day)          | 1830.0 (793.5) | 1348.0 (560.1) | 1542.2 (554.6) | 1867.2 (584.3) | 2562.8 (838.5) | <0.001  |
| Protein intake (g/day)            | 71.9 (33.2)    | 54.2 (26.7)    | 62.0 (24.8)    | 73.7 (28.0)    | 97.5 (35.2)    | <0.001  |
| Fat intake (g/day)                | 67.5 (32.1)    | 46.4 (21.5)    | 56.0 (21.3)    | 69.0 (22.9)    | 98.7 (33.7)    | <0.001  |
| Carbohydrate intake (g/day)       | 229.7 (109.0)  | 178.5 (83.5)   | 193.0 (82.6)   | 232.9 (87.3)   | 314.4 (122.2)  | <0.001  |
| Western pattern                   | 0.00 (1.00)    | 0.11 (1.09)    | -0.09 (0.95)   | -0.05 (0.91)   | 0.03 (1.03)    | <0.001  |
| Prudent pattern                   | -0.00 (1.00)   | -1.02 (0.25)   | -0.45 (0.14)   | 0.10 (0.19)    | 1.37 (0.87)    | <0.001  |
| Age (years)                       | 65.4 (10.0)    | 65.7 (10.1)    | 65.6 (9.9)     | 65.8 (9.9)     | 64.6 (10.0)    | 0.027   |
| Gender                            |                |                |                |                |                | <0.001  |
| Men                               | 1,736 (40.8%)  | 332 (31.2%)    | 394 (37.1%)    | 459 (43.2%)    | 551 (51.8%)    |         |
| Women                             | 2,517 (59.2%)  | 732 (68.8%)    | 669 (62.9%)    | 604 (56.8%)    | 512 (48.2%)    |         |
| Race                              |                |                |                |                |                | <0.001  |
| White                             | 3,286 (77.5%)  | 774 (73.0%)    | 851 (80.4%)    | 855 (80.6%)    | 806 (76.0%)    |         |
| Black African American            | 632 (14.9%)    | 166 (15.7%)    | 137 (12.9%)    | 137 (12.9%)    | 192 (18.1%)    |         |
| Other                             | 323 ( 7.6%)    | 120 (11.3%)    | 71 ( 6.7%)     | 69 ( 6.5%)     | 63 ( 5.9%)     |         |
| Education                         |                |                |                |                |                | <0.001  |
| High school grad or below         | 2,073 (48.8%)  | 497 (46.8%)    | 493 (46.5%)    | 499 (46.9%)    | 584 (54.9%)    |         |
| Some college/college grad         | 1,085 (25.5%)  | 265 (24.9%)    | 257 (24.2%)    | 291 (27.4%)    | 272 (25.6%)    |         |
| Post-college                      | 1,092 (25.7%)  | 301 (28.3%)    | 311 (29.3%)    | 273 (25.7%)    | 207 (19.5%)    |         |
| Smoking                           |                |                |                |                |                | <0.001  |
| None                              | 1,934 (45.7%)  | 565 (53.3%)    | 494 (46.6%)    | 488 (46.1%)    | 387 (36.7%)    |         |
| Ex-smoker                         | 1,889 (44.6%)  | 441 (41.6%)    | 488 (46.0%)    | 481 (45.5%)    | 479 (45.4%)    |         |
| Current smoker                    | 410 ( 9.7%)    | 54 ( 5.1%)     | 78 ( 7.4%)     | 89 ( 8.4%)     | 189 (17.9%)    |         |
| Alcohol drinking                  |                |                |                |                |                | 0.053   |
| No                                | 1,838 (43.3%)  | 467 (44.0%)    | 437 (41.1%)    | 441 (41.6%)    | 493 (46.4%)    |         |
| Yes                               | 2,411 (56.7%)  | 595 (56.0%)    | 626 (58.9%)    | 620 (58.4%)    | 570 (53.6%)    |         |
| <b>Vigorous physical activity</b> |                |                |                |                |                | <0.001  |
| < 2 times/week                    | 3,183 (75.2%)  | 734 (69.6%)    | 785 (74.3%)    | 799 (75.4%)    | 865 (81.7%)    |         |
| ≥ 2 times/week                    | 1,047 (24.8%)  | 321 (30.4%)    | 272 (25.7%)    | 260 (24.6%)    | 194 (18.3%)    |         |
| Central obesity                   | 2,849 (71.6%)  | 660 (67.6%)    | 706 (70.5%)    | 730 (72.9%)    | 753 (75.6%)    | <0.001  |
| Elevated glucose                  | 2,129 (50.3%)  | 524 (49.6%)    | 514 (48.5%)    | 527 (49.9%)    | 564 (53.2%)    | 0.17    |
| Elevated triglycerides            | 1,504 (35.4%)  | 337 (31.7%)    | 347 (32.6%)    | 398 (37.4%)    | 422 (39.7%)    | <0.001  |
| Reduced HDL-C                     | 1,059 (24.9%)  | 227 (21.3%)    | 239 (22.5%)    | 269 (25.3%)    | 324 (30.5%)    | <0.001  |
| Elevated blood pressure           | 2,966 (69.8%)  | 740 (69.6%)    | 694 (65.3%)    | 749 (70.5%)    | 783 (73.7%)    | <0.001  |
| Depression                        | 543 (12.8%)    | 132 (12.4%)    | 125 (11.8%)    | 114 (10.7%)    | 172 (16.2%)    | 0.001   |
| Sleep disorder                    | 1,345 (31.6%)  | 316 (29.7%)    | 329 (31.0%)    | 334 (31.4%)    | 366 (34.5%)    | 0.11    |
| Metabolic syndrome                | 2,055 (48.3%)  | 486 (45.7%)    | 467 (43.9%)    | 526 (49.5%)    | 576 (54.2%)    | <0.001  |
| Circadian syndrome                | 1,527 (35.9%)  | 342 (32.1%)    | 357 (33.6%)    | 391 (36.8%)    | 437 (41.1%)    | <0.001  |

Data are presented as mean (SD) for continuous measures, and n (%) for categorical measures. \*P-value < 0.05
